# Supplementary material for: Dehydrogenation of formic acid using iridium-NSi species as catalyst precursors
Source: Royal Society of Chemistry journal article supplement (doi:10.1039/d1dt04335h), 2022-01-01
Supplement: d1dt04335h1.pdf [file d1dt04335h1.pdf]

## Supporting Information

### Dehydrogenation of Formic Acid Using Iridium-NSi Species as Catalyst Precursors

Jefferson Guzmán,<sup>a</sup> Asier Urriolabeitia,<sup>b</sup> Víctor Polo,<sup>b</sup> Marta Fernández-Buenestado,<sup>a</sup> Manuel Iglesias<sup>a</sup> and Francisco J. Fernández-Alvarez<sup>a,\*</sup>

<sup>a</sup>*Departamento de Química Inorgánica – Instituto de Síntesis Química y Catálisis Homogénea (ISQCH).  
Universidad de Zaragoza – CSIC, 50009, Zaragoza – Spain.  
E-mail: [paco@unizar.es](mailto:paco@unizar.es)*

<sup>b</sup>*Departamento de Química Física – Instituto de Biocomputación y Física de Sistemas Complejos (BIFI).  
Universidad de Zaragoza 50009, Zaragoza – Spain*

#### Table of Contents

|                                                                        |     |
|------------------------------------------------------------------------|-----|
| General Procedure.....                                                 | S2  |
| NMR Studies .....                                                      | S3  |
| TON and TOF determination .....                                        | S7  |
| Effect of the silicon substituents with NEt <sub>3</sub> as base ..... | S7  |
| NEt <sub>3</sub> concentration effect .....                            | S8  |
| Temperature effect.....                                                | S8  |
| 2-Catalysed FA dehydrogenation with optimized conditions .....         | S9  |
| FT-IR and GC of gaseous product.....                                   | S9  |
| Arrhenius Plot .....                                                   | S10 |
| Eyring plot .....                                                      | S11 |
| KIE Experiments .....                                                  | S12 |
| Studies of the black precipitate .....                                 | S12 |
| Mercury drop test.....                                                 | S13 |
| DFT Calculations .....                                                 | S13 |

## General Procedure

Catalytic reactions were carried out on a microreactor (Man on the Moon series X102 Kit) with a total volume of 19 mL. Under an argon atmosphere, the reactor was filled with the desired amount of base (sodium formate or  $\text{NEt}_3$ ) and of formic acid. The reactor was then closed and heated to the desired temperature in an oil bath. When the system is stabilized, the desired amount of complex, dissolved in a small amount of formic acid, is then injected with a microsyringe.

**SF concentration effect:** 500  $\mu\text{L}$  of FA, 0.025 mol % of **1** (2.6 mg,  $3.25 \cdot 10^{-3}$  mmol), and 2.5 mol % of SF (22.5 mg, 0.33 mmol), or 5 mol % of SF (45.0 mg, 0.66 mmol), or 10 mol % of SF (90.0 mg, 1.32 mmol) at 80  $^\circ\text{C}$ .

**Complex 1 concentration effect:** 500  $\mu\text{L}$  of FA, 5 mol % of sodium formate (45.0 mg, 0.66 mmol), 0.025 mol % of **1** (2.6 mg,  $3.25 \cdot 10^{-3}$  mmol), or 0.05 mol % of **1** (5.2 mg,  $6.50 \cdot 10^{-3}$  mmol), or 0.1 mol % (10.4 mg, 0.013 mmol) at 80  $^\circ\text{C}$ .

**Effect of the silicon substituents in the FA dehydrogenation with SF as base:** 500  $\mu\text{L}$  of FA, 5 mol % of sodium formate (45.0 mg, 0.66 mmol), 0.025 mol % of **1** (2.6 mg,  $3.25 \cdot 10^{-3}$  mmol) or 0.025 mol % of **2** (2.25 mg,  $3.25 \cdot 10^{-3}$  mmol) at 80  $^\circ\text{C}$ .

**Effect of the silicon substituents in the FA dehydrogenation with  $\text{NEt}_3$  as base:** 500  $\mu\text{L}$  of FA, 10 mol % of  $\text{NEt}_3$  (186  $\mu\text{L}$ , 1.32 mmol), 0.1 mol % of **1** (10.4 mg, 0.013 mmol) or 0.1 mol % of **2** (9 mg, 0.013 mmol) at 80  $^\circ\text{C}$ .

**$\text{NEt}_3$  concentration effect:** 500  $\mu\text{L}$  of FA, 0.1 mol % of **2** (9 mg, 0.013 mmol) and 1.0 mol % (18.6  $\mu\text{L}$ , 0.13 mmol), 2.5 mol % (46.5  $\mu\text{L}$ , 0.32 mmol), 5.0 mol % (93  $\mu\text{L}$ , 0.65 mmol) 10 mol % (186  $\mu\text{L}$ , 1.32 mmol), 20 mol % (372  $\mu\text{L}$ , 2.64 mmol) or 40 mol % (744  $\mu\text{L}$ , 5.28 mmol) of  $\text{NEt}_3$  at 80  $^\circ\text{C}$ .

**Temperature effect:** 500  $\mu\text{L}$  of FA, 0.1 mol % of **2** (9 mg, 0.013 mmol) and 10 mol % (186  $\mu\text{L}$ , 1.32 mmol) of  $\text{NEt}_3$  at different temperatures (from 40 to 100  $^\circ\text{C}$ ).

**KIE Experiments:** 250  $\mu\text{L}$  of FA ( $\text{HCOOH}$ ,  $\text{HCOOD}$ ,  $\text{DCOOH}$  or  $\text{DCOOD}$ ), 0.1 mol % of **2** (4.5 mg,  $6.5 \cdot 10^{-3}$  mmol) and 40 mol % (372  $\mu\text{L}$ , 2.64 mmol) of  $\text{NEt}_3$  at 80  $^\circ\text{C}$ .

**Studies of the black precipitated:** Black precipitate was separated from the reaction medium and washed with distilled water and dried in vacuo for its measurements in TEM spectroscopy.

**FT-IR and GC of gaseous product:** FT-IR: Gaseous products from the catalysis were collected in a rubber balloon that was attached to a Schlenk containing the reaction mixture: 500  $\mu\text{L}$  of FA, 0.1 mol % of **2** (9 mg, 0.013 mmol) and 10 mol % of  $\text{NEt}_3$  (186  $\mu\text{L}$ , 1.32 mmol) at 80 $^\circ\text{C}$ . The gas sample was transferred to the cell and the FT-IR spectrum was acquired. GC: The gaseous mixture was taken directly from the microreactor and injected into the cell.

**Mercury drop test:** A drop of mercury was added to the microreactor together with 450  $\mu\text{L}$  of FA, and 10 mol % (186  $\mu\text{L}$ , 1.32 mmol) of  $\text{NEt}_3$ , the system was heated at 80 $^\circ\text{C}$ . When the system is stabilized, a solution of 0.1 mol % of **2** (9 mg, 0.013 mmol) in 50  $\mu\text{L}$  of FA was injected to the reaction mixture.

## NMR Studies

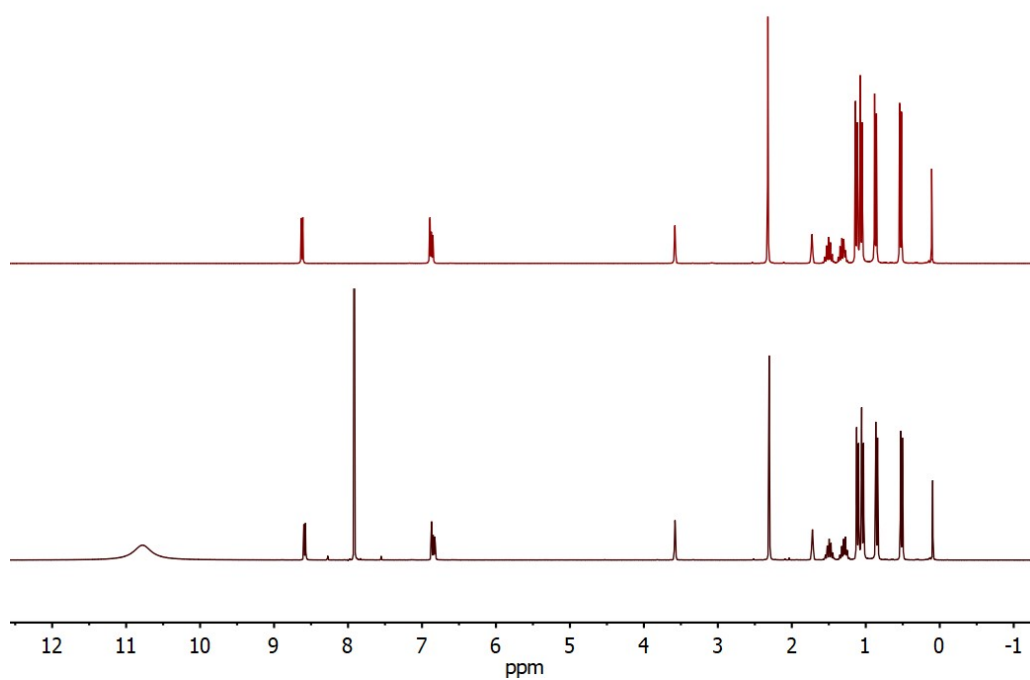

Figure S1. (up)  $^1\text{H}$  NMR spectrum of **1** in  $\text{thf-d}_8$ ; (down)  $^1\text{H}$  NMR spectrum of **1** and  $\text{HCOOH}$  (20 eq.) in  $\text{thf-d}_8$  after heating at 323 K for 3 h.

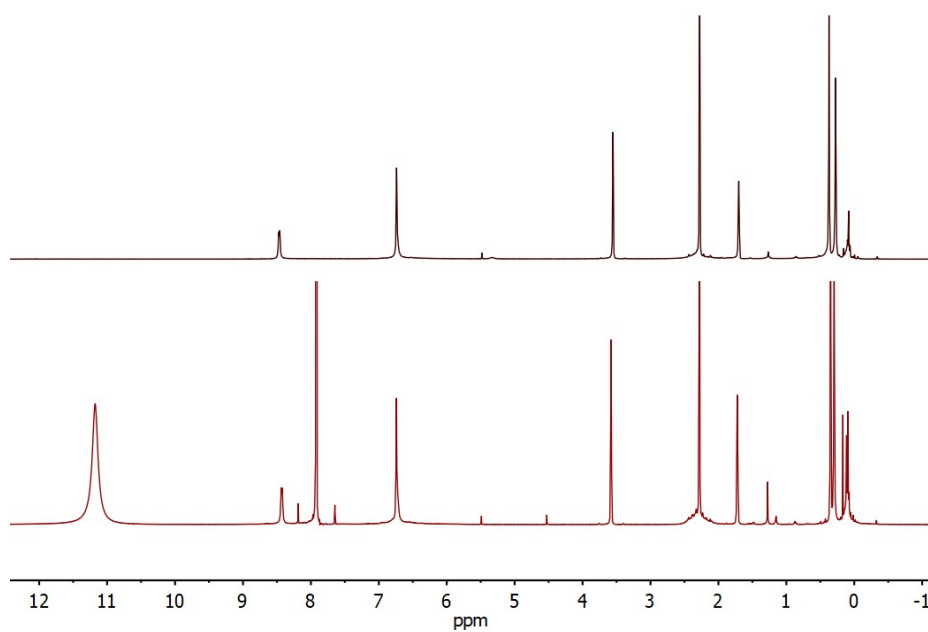

Figure S2. (up)  $^1\text{H}$  NMR spectrum of **2** in  $\text{thf-d}_8$ ; (down)  $^1\text{H}$  NMR spectrum of **2** and  $\text{HCOOH}$  (20 eq.) in  $\text{thf-d}_8$  after heating at 323 K for 3 h.

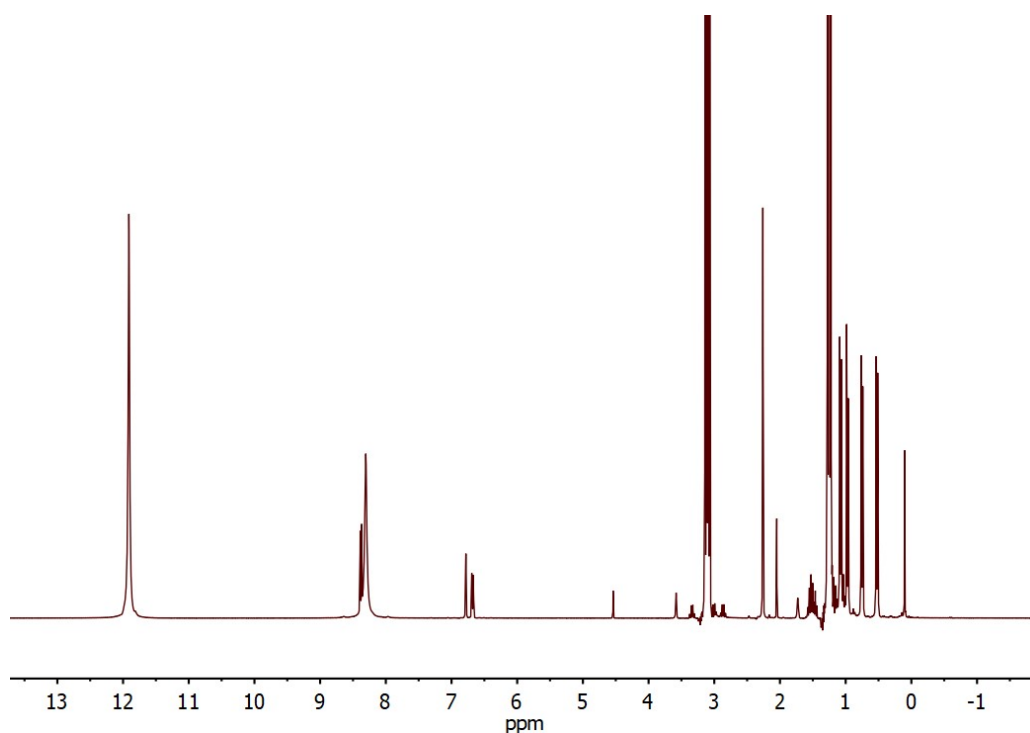

Figure S3.  $^1\text{H}$  NMR spectrum of **1**,  $\text{HCOOH}$  (20 eq.),  $\text{Et}_3\text{N}$  (40 mol% to FA) in  $\text{thf-d}_8$ , after heating at 323 K for 30 min.

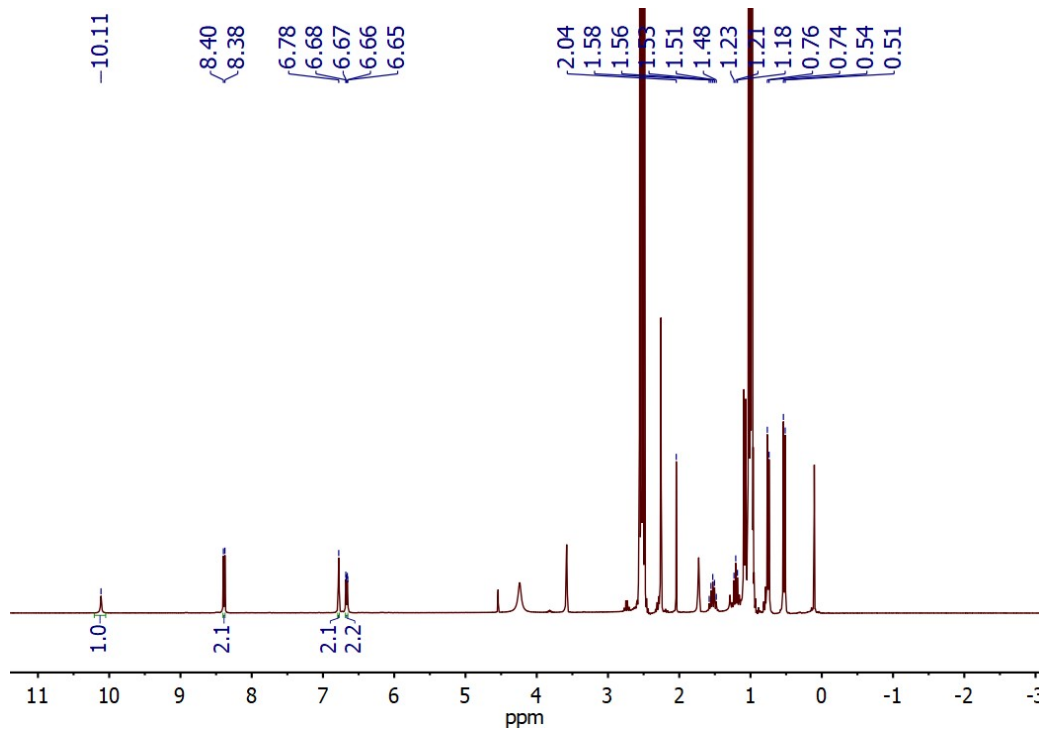

Figure S4.  $^1\text{H}$  NMR spectrum of **1**-catalyzed FADH reaction in  $\text{thf-d}_8$  once all the FA has been consumed. The only Ir-compound observed is species **3**.

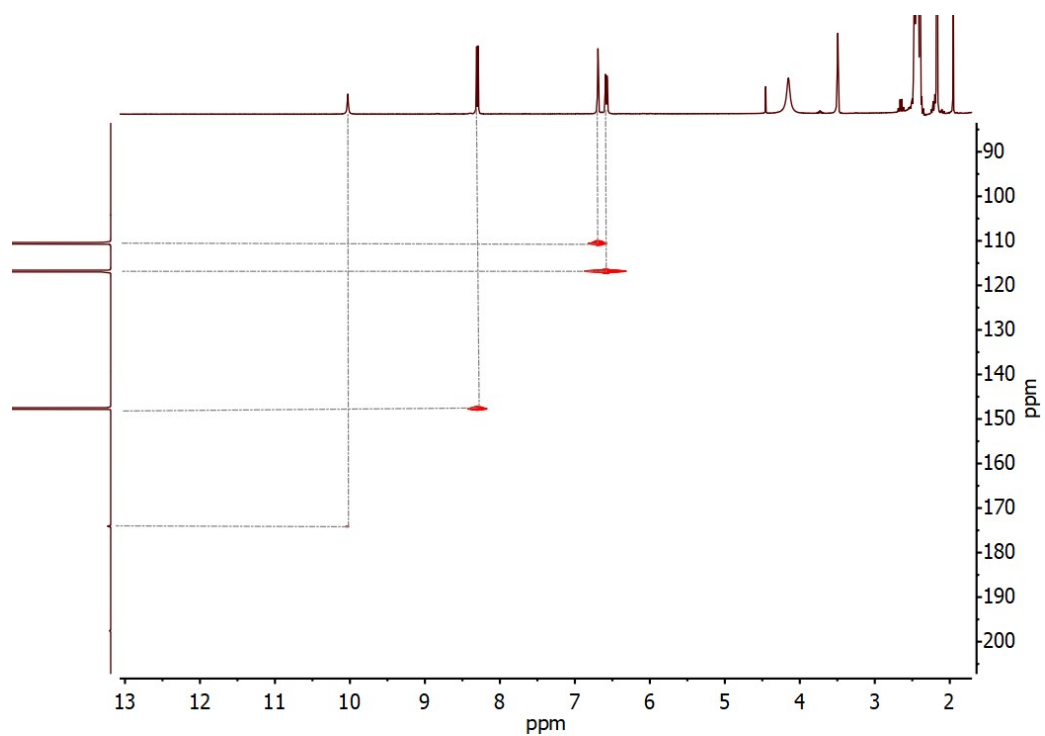

Figure S5.  $^1\text{H}$ - $^{13}\text{C}$  HSQC NMR spectrum of **3** solutions in  $\text{thf-d}_8$ .

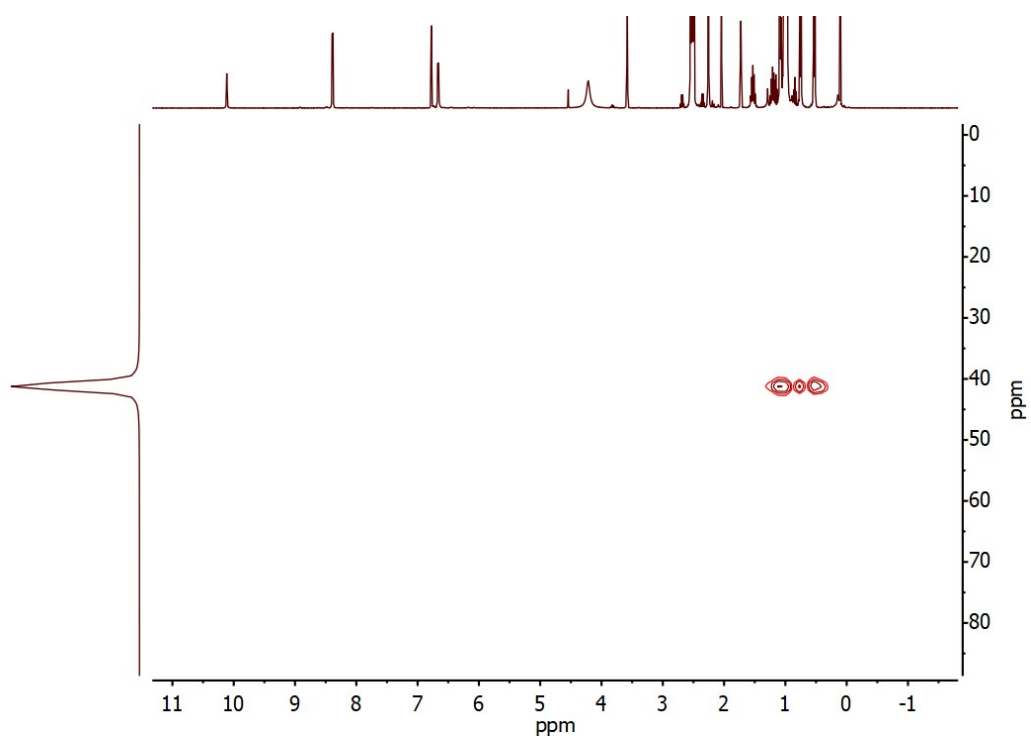

Figure S6.  $^1\text{H}$ - $^{29}\text{Si}$  HSQC NMR spectrum of **3** solutions in  $\text{thf-d}_8$ .

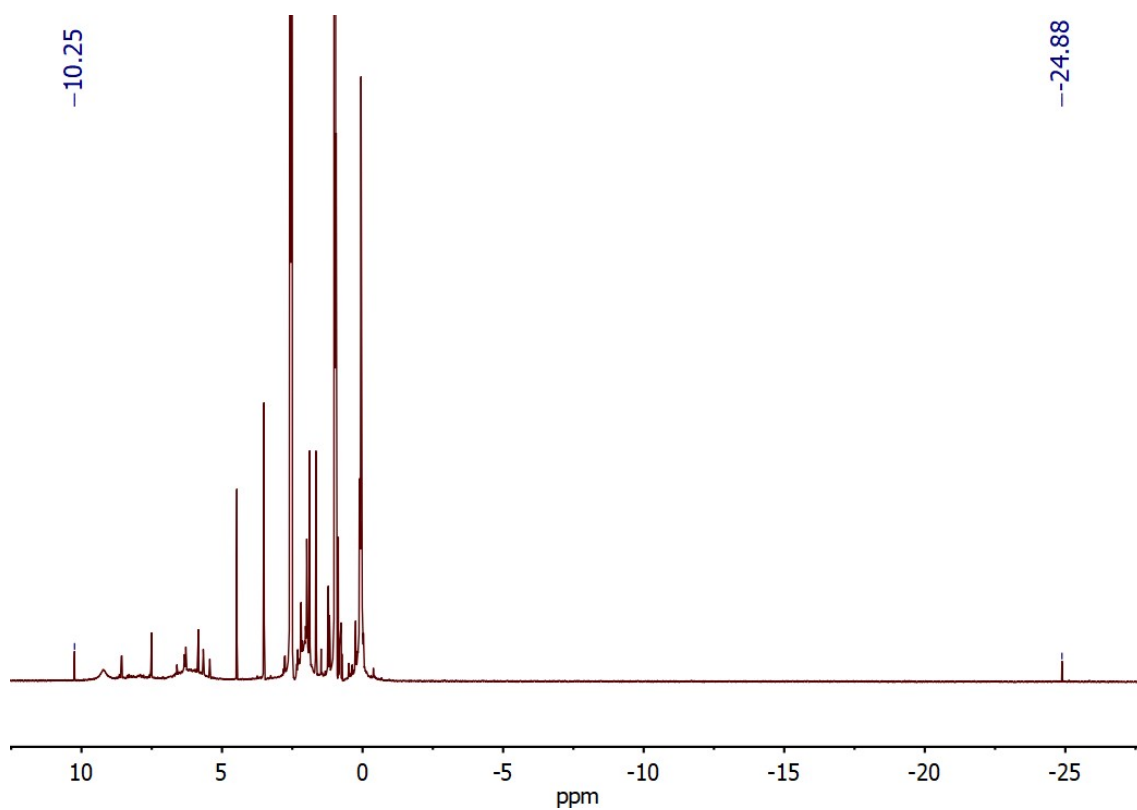

Figure S7.  $^1\text{H}$  NMR spectrum of **2**-catalyzed FADH reaction in thf- $\text{d}_8$  once all the FA has been consumed.

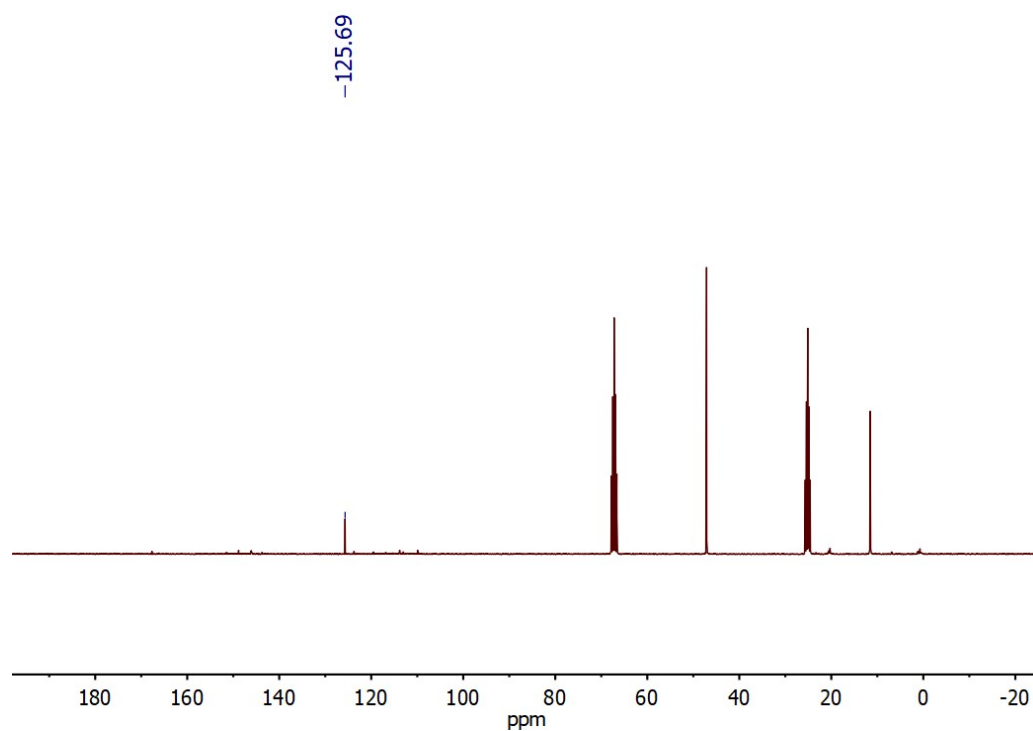

Figure S8.  $^{13}\text{C}$  NMR spectrum of **2**-catalyzed FADH reaction in thf- $\text{d}_8$  once all the FA has been consumed.

## TON and TOF determination

H<sub>2</sub> pressure: 
$$P_{H_2} = \frac{P_{measured}}{2}$$

Amount of H<sub>2</sub> formed calculated with the Ideal Gas Law: 
$$n_{H_2} = \frac{P_{H_2}V}{RT};$$

*Total Volume = 0.019 L; R constant = 0.08314 bar L mol<sup>-1</sup> K<sup>-1</sup>*

$$TON = \frac{n_{H_2}}{n_{cat}}$$

$$TOF = \frac{TON}{t}$$

## Effect of the silicon substituents with NEt<sub>3</sub> as base

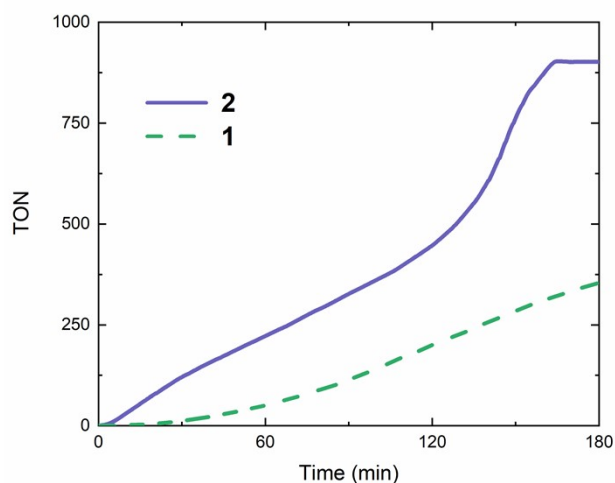

Figure S9. TON vs time comparison of the **1**- or **2**-catalyzed (0.1 mol %) solventless dehydrogenation of formic acid using triethylamine (10 mol %) at 80°C.

### NEt<sub>3</sub> concentration effect

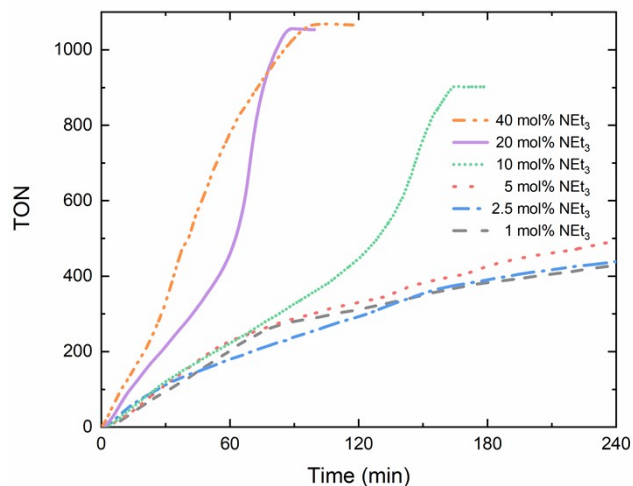

Figure S10. TON vs time representation of the **2**-catalyzed (0.1 mol %) solvent-free FA dehydrogenation with different concentrations of NEt<sub>3</sub> at 80°C

### Temperature effect

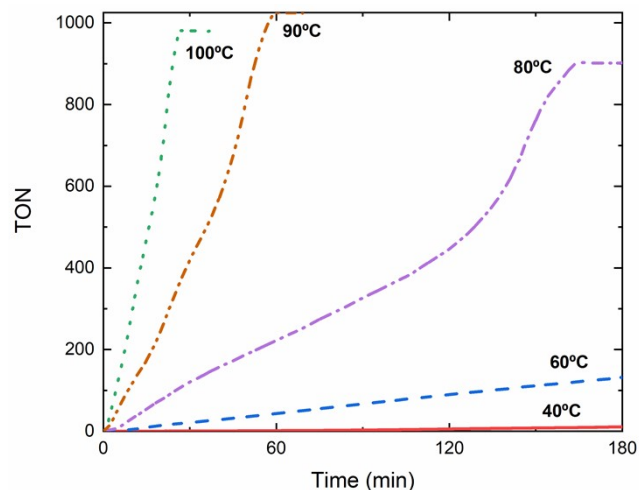

Figure S11. TON vs time representation of the **2**-catalyzed (0.1 mol %) solvent-free FA dehydrogenation with 10 mol % of NEt<sub>3</sub> at different temperatures.



## 2-Catalysed FA dehydrogenation with optimized conditions

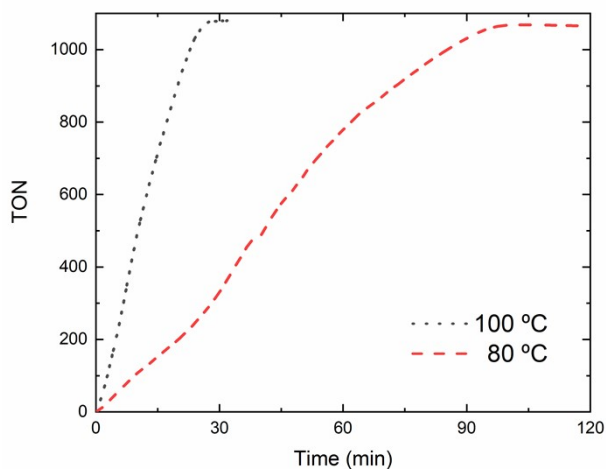

Figure S12. TON vs time representation of the 2-catalysed FA solvent-less dehydrogenation with  $\text{NEt}_3$  (40 mol %) at 80 and 100 °C.

## FT-IR and GC of gaseous product

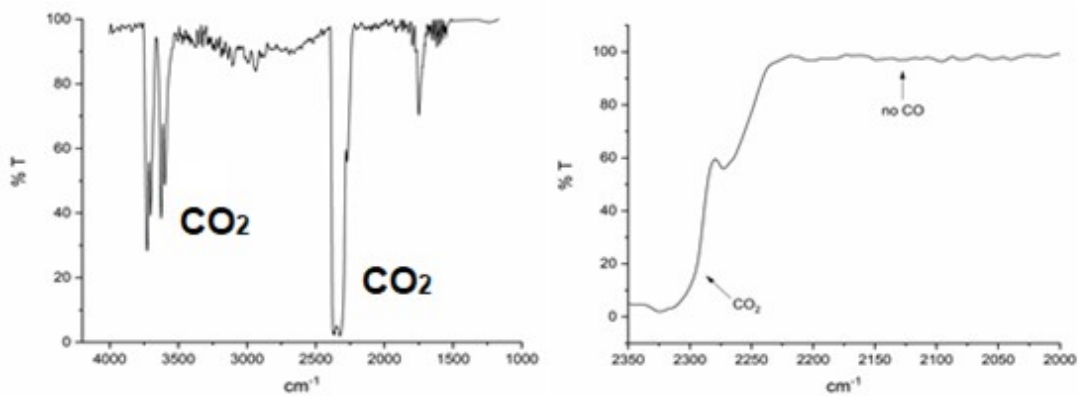

Figure S13. (Left) FT-IR spectrum of the gaseous product. (Right) Detail from the FT-IR spectrum showing the absence of CO signal.

File :C:\msdchem\1\data\20210608\_JGV A.D  
Operator :  
Acquired : 8 Jun 21 2:46 pm using AcqMethod ANALISIS GASESCPLOTMOLSIEVE.M  
Instrument : GCMSD  
Sample Name :  
Misc Info :  
Vial Number: 1

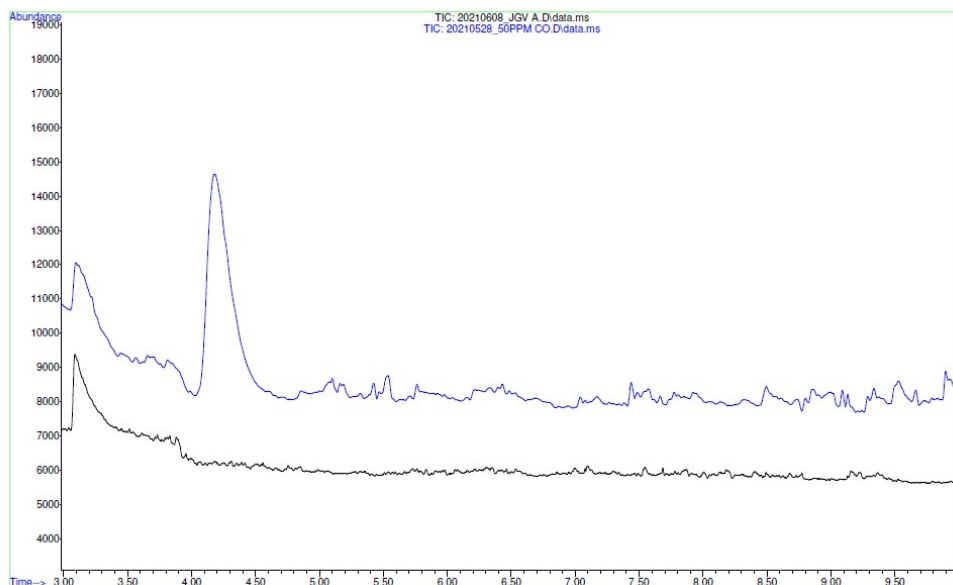

Figure S14. Gas chromatography of the gaseous mixture formed in the **2**-catalyzed (0.1 mol %) solvent-free FA dehydrogenation with 40 mol % of  $\text{NEt}_3$  at  $80^\circ\text{C}$

### Arrhenius Plot

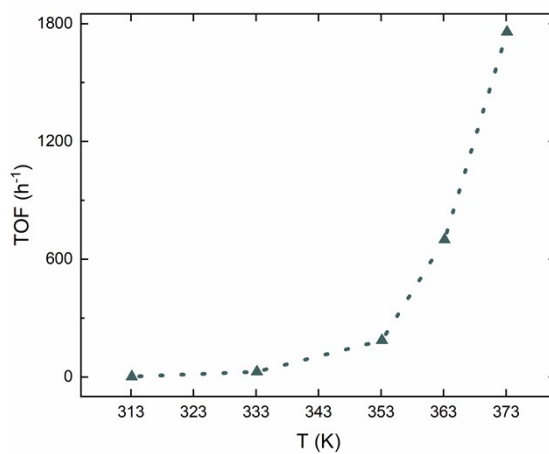

Figure S15.  $\text{TOF}_{5\text{min}}$  ( $\text{h}^{-1}$ ) versus T (K) from the **2**-catalyzed solvent-free FA dehydrogenation.

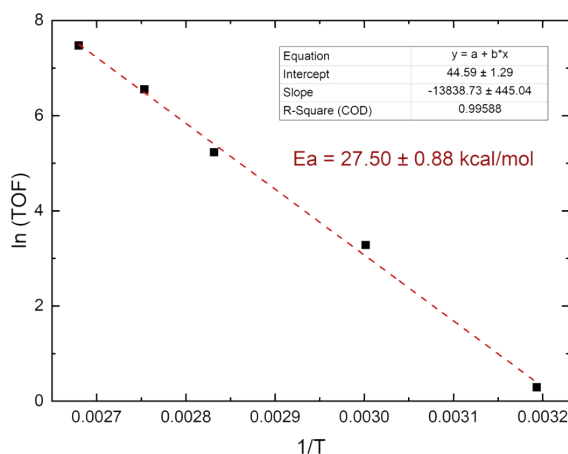

Figure S16. Arrhenius plot of the **2**-catalysed solvent-free FA dehydrogenation (apparent activation energy of 27.5 kcal mol<sup>-1</sup>)

### Eyring plot

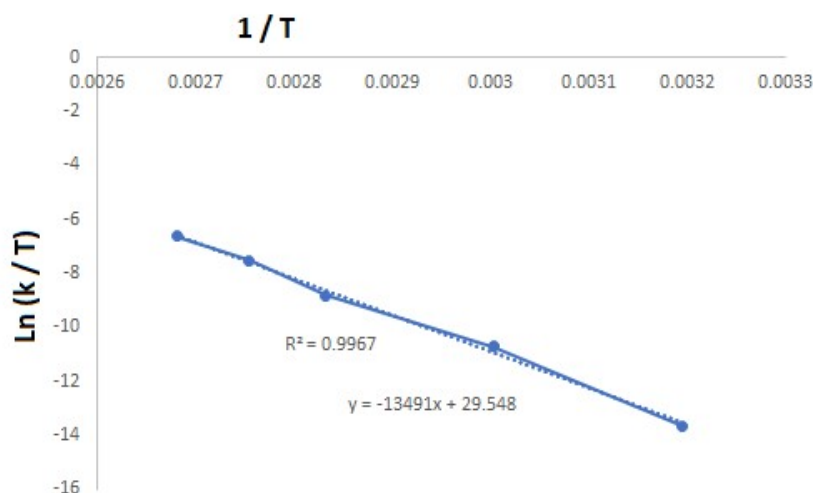

Data:

| Point | T (°C) | T (K)  | 1/T (K <sup>-1</sup> ) | k (h <sup>-1</sup> ) | k (s <sup>-1</sup> )  | k/T                   | Ln (k/T) |
|-------|--------|--------|------------------------|----------------------|-----------------------|-----------------------|----------|
| 1     | 40     | 313.13 | 0.003194               | 1.3334               | $3.704 \cdot 10^{-4}$ | $1.183 \cdot 10^{-6}$ | -13.65   |
| 2     | 60     | 333.13 | 0.003002               | 26.5894              | $7.386 \cdot 10^{-3}$ | $2.217 \cdot 10^{-5}$ | -10.717  |
| 3     | 80     | 353.13 | 0.002832               | 186.3074             | $5.175 \cdot 10^{-2}$ | $1.465 \cdot 10^{-4}$ | -8.828   |
| 4     | 90     | 363.13 | 0.002754               | 699.4523             | $1.943 \cdot 10^{-1}$ | $5.351 \cdot 10^{-4}$ | -7.533   |
| 5     | 100    | 373.13 | 0.002680               | 1757.6207            | $4.882 \cdot 10^{-1}$ | $1.308 \cdot 10^{-3}$ | -6.639   |

Figure S17. Representation of LnK versus 1/T;  $y = -13491x + 29.548$ ;  $R^2 = 0.9967$ ; Activation Enthalpy =  $112.2 \pm 1.7$  kJ mol<sup>-1</sup> ( $26.8 \pm 0.4$  kcal mol<sup>-1</sup>) Activation Entropy =  $47.7 \pm 6$  J K<sup>-1</sup> mol<sup>-1</sup> ( $11.4 \pm 1.5$  cal K<sup>-1</sup> mol<sup>-1</sup>). The errors in the activation parameters were calculated following error propagation formulas (P. M. Morse, M. D. Spencer, S. R. Wilson, G. S. Girolami, Organometallics, 1994, 13, 1646-1655).

## KIE Experiments

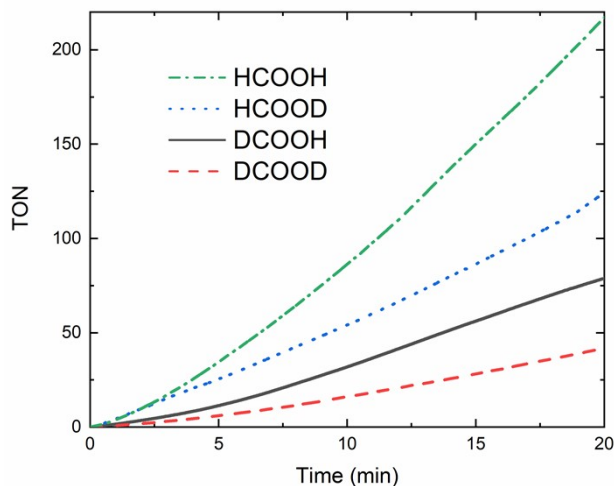

Figure S18. TON vs time representation of the **2**-catalyzed (0.1 mol %) solvent-free FA dehydrogenation with 40 mol % of  $\text{NEt}_3$  at  $80^\circ\text{C}$

## Studies of the black precipitate

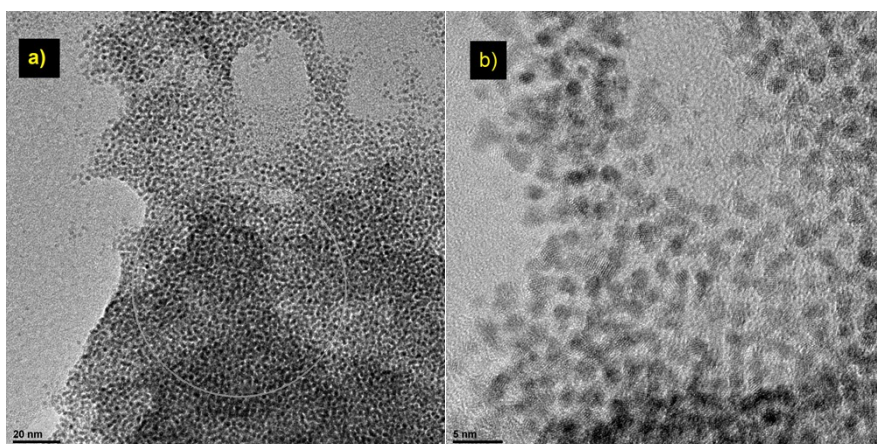

Figure S19. Transmission Electronic Microscopy images of the dark iridium nanoparticles. a) TEM image (20 nm). b) Closer image showing lattice fringes (5 nm).

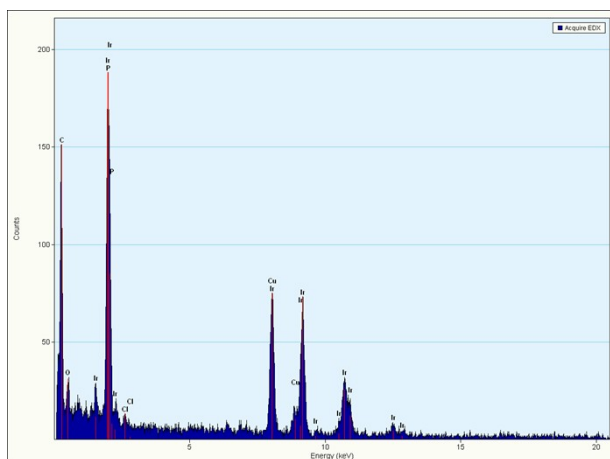

Figure S20. EDX spectrum of the iridium nanoparticles.

## Mercury drop test

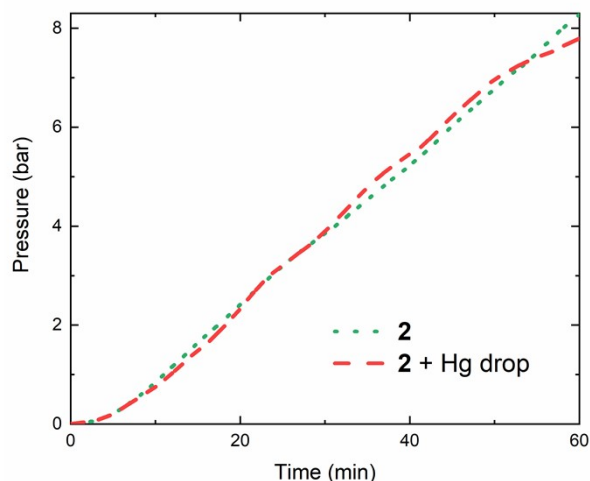

Figure S21. Pressure vs time representation of the **2**-catalysed (0.1 mol %) solvent-free dehydrogenation of FA with  $\text{NEt}_3$  (10 mol %) at  $80^\circ\text{C}$  both in presence and absence of a mercury drop.

## DFT Calculations

**Table S1.** Energetic values for all DFT calculated species. Geometrical optimizations performed at a B3LYP-D3(PCM)/def2-SVP level, E(DZ). Single point energies B3LYP-D3(BJ)/def2-TZVP, E(TZ). Frequencies were calculated at the same level than the optimization,  $G_{\text{corr}}$ , in the case of HCOOH the translational entropy contribution to the free energy was removed. Relative Gibbs free energies,  $\Delta G$ , were calculated adding E(TZ) and  $G_{\text{corr}}$  and relative to **A** and isolated molecules. All absolute energies are given in a.u. and relative Gibbs free energies are given in  $\text{kcal mol}^{-1}$ .

|               | E(DZ)      | E(TZ)      | $G_{\text{corr}}$ | $\Delta G$ |
|---------------|------------|------------|-------------------|------------|
| <b>A</b>      | -1756.1623 | -1757.5897 | 0.3124            | 0.0        |
| <b>A + FA</b> | -1945.8135 | -1947.4654 | 0.3399            | -9.8       |
| <b>B</b>      | -1945.8198 | -1947.4656 | 0.3418            | -8.7       |
| <b>TSAC</b>   | -1756.1136 | -1757.5458 | 0.3061            | 23.6       |
| <b>TSBC</b>   | -1945.7719 | -1947.4232 | 0.3368            | 14.7       |
| <b>C</b>      | -1945.7805 | -1947.4325 | 0.3334            | 6.8        |
| <b>TSCA</b>   | -1945.7798 | -1947.4320 | 0.3302            | 5.1        |
| HCOOH         | -189.6290  | -189.8587  | 0.0260            |            |
| $\text{CO}_2$ | -188.4447  | -188.6740  | -0.0136           |            |
| $\text{H}_2$  | -1.1741    | -1.1798    | -0.0044           |            |

Figure S22. Geometrical representation for the DFT optimized structures. Only the most relevant hydrogen atoms are shown for clarity and distances are given in Å.

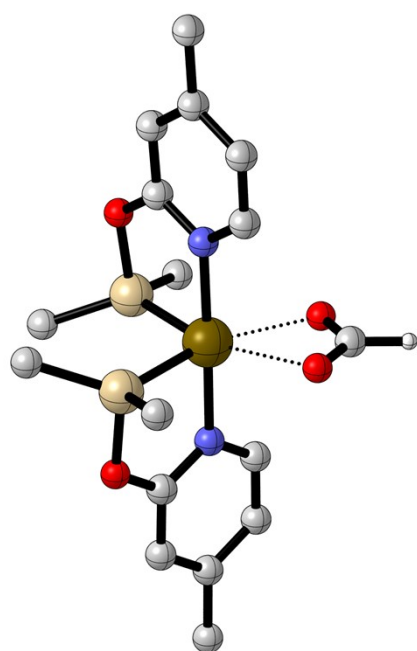

**A**

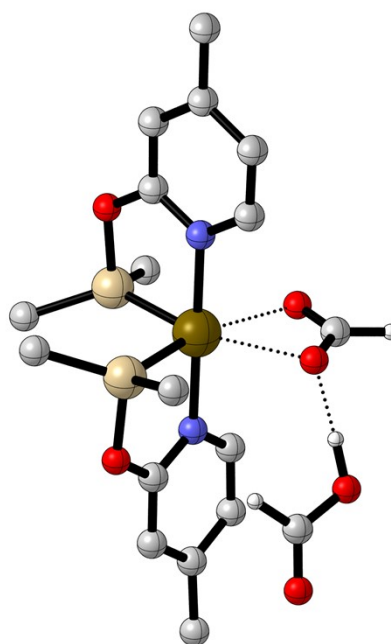

**A + FA**

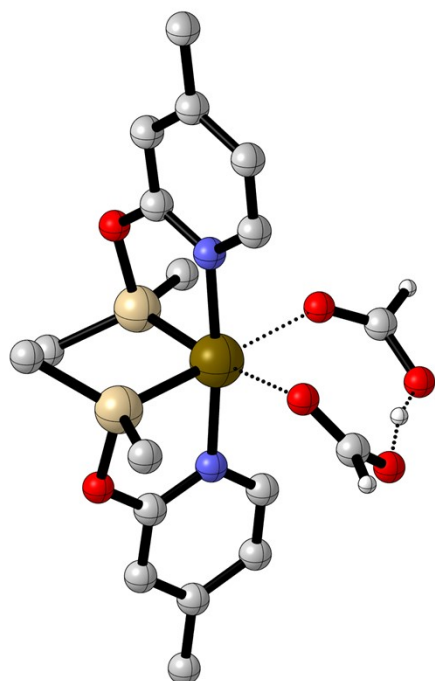

**B**

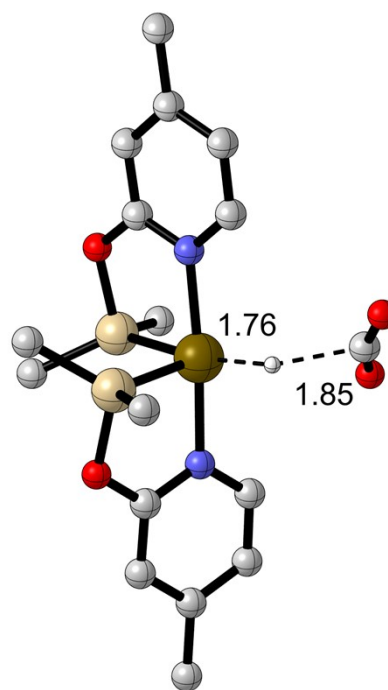

**TSAC**

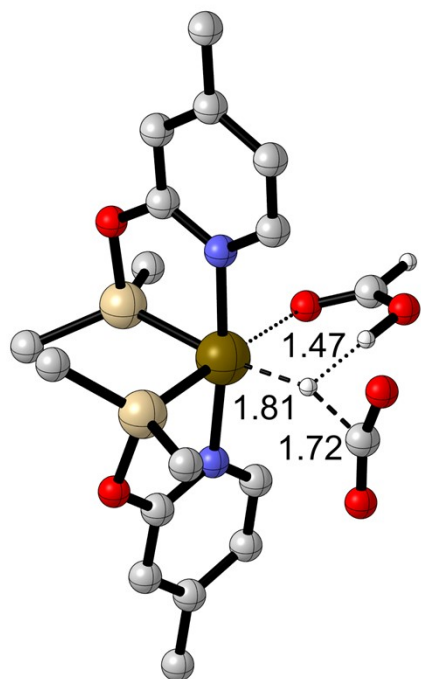

TSBC

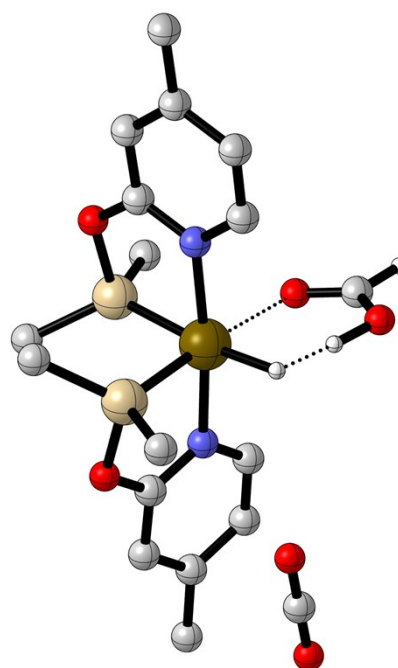

C

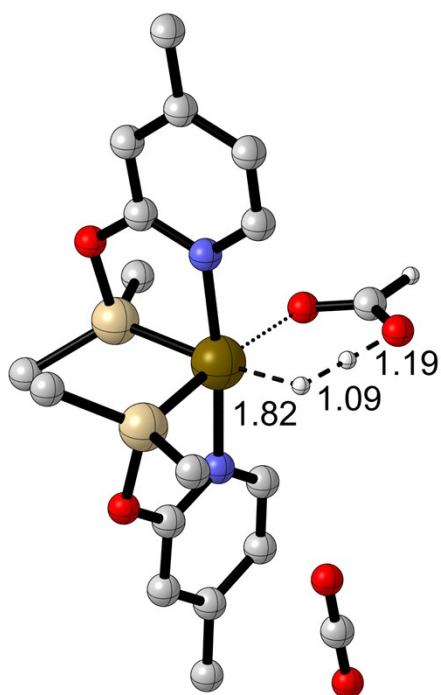

TSCA

**Table S2. Cartesian coordinates (XYZ data) for all DFT calculated species**

| 51 |           |           |           | 56   |           |           |           |
|----|-----------|-----------|-----------|------|-----------|-----------|-----------|
| A  |           |           |           | A+FA |           |           |           |
| 77 | 0.000000  | 0.352515  | -0.000003 | 77   | 0.260001  | 0.002452  | -0.249494 |
| 7  | -2.080661 | 0.328582  | 0.036758  | 7    | 2.285406  | -0.446546 | -0.126522 |
| 6  | -2.784214 | 1.163413  | 0.840753  | 6    | 2.715503  | -1.724600 | 0.014248  |
| 6  | -2.755177 | -0.566472 | -0.733808 | 6    | 3.201301  | 0.557435  | -0.159253 |
| 6  | -4.162184 | 1.141334  | 0.914708  | 6    | 4.050942  | -2.051701 | 0.130584  |
| 1  | -2.180464 | 1.858477  | 1.425185  | 1    | 1.929077  | -2.480385 | 0.030397  |
| 6  | -4.160037 | -0.630614 | -0.699480 | 6    | 4.575565  | 0.281548  | -0.046452 |
| 6  | -4.886371 | 0.220338  | 0.126605  | 6    | 5.022580  | -1.027124 | 0.102098  |
| 1  | -4.675704 | 1.835387  | 1.581623  | 1    | 4.340546  | -3.097269 | 0.244229  |
| 1  | -4.651035 | -1.366142 | -1.337496 | 1    | 5.268150  | 1.123148  | -0.079060 |
| 7  | 2.080661  | 0.328582  | -0.036762 | 7    | -1.774703 | 0.432214  | -0.330962 |
| 6  | 2.755177  | -0.566462 | 0.733815  | 6    | -2.441205 | 0.737791  | 0.816064  |
| 6  | 2.784214  | 1.163405  | -0.840765 | 6    | -2.468824 | 0.366314  | -1.492878 |
| 6  | 4.160037  | -0.630604 | 0.699488  | 6    | -3.824566 | 0.975952  | 0.803236  |
| 6  | 4.162183  | 1.141326  | -0.914720 | 6    | -3.831053 | 0.578709  | -1.560123 |
| 1  | 2.180463  | 1.858462  | -1.425205 | 1    | -1.877964 | 0.121116  | -2.375776 |
| 6  | 4.886371  | 0.220338  | -0.126606 | 6    | -4.545794 | 0.882434  | -0.382441 |
| 1  | 4.651035  | -1.366124 | 1.337514  | 1    | -4.310924 | 1.200009  | 1.752920  |
| 1  | 4.675704  | 1.835373  | -1.581640 | 1    | -4.339728 | 0.501045  | -2.521815 |
| 8  | -2.072630 | -1.384300 | -1.510681 | 8    | 2.779543  | 1.800373  | -0.289915 |
| 8  | 2.072630  | -1.384282 | 1.510697  | 8    | -1.770700 | 0.784411  | 1.951622  |
| 14 | -0.308537 | -1.202831 | -1.635441 | 14   | 1.057535  | 2.109116  | -0.587408 |
| 14 | 0.308537  | -1.202808 | 1.635457  | 14   | -0.062793 | 0.302749  | 1.986187  |
| 6  | -0.029411 | -0.414006 | -3.327601 | 6    | 0.950069  | 2.523711  | -2.423666 |
| 1  | 1.054057  | -0.313230 | -3.509328 | 1    | 1.258471  | 1.668382  | -3.043146 |
| 1  | -0.455728 | -1.035681 | -4.132623 | 1    | -0.092425 | 2.773341  | -2.683168 |
| 1  | -0.474392 | 0.591255  | -3.376839 | 1    | 1.583170  | 3.392659  | -2.669105 |
| 6  | 0.337469  | -2.967048 | -1.718824 | 6    | 0.676768  | 3.667873  | 0.387370  |
| 1  | 0.228416  | -3.364612 | -2.740892 | 1    | -0.409062 | 3.755690  | 0.553658  |
| 1  | 1.407260  | -2.993064 | -1.454885 | 1    | 1.176467  | 3.670373  | 1.365201  |
| 1  | -0.201697 | -3.630525 | -1.029207 | 1    | 1.008756  | 4.554721  | -0.176347 |
| 6  | -0.337470 | -2.967023 | 1.718862  | 6    | 0.747251  | 1.541720  | 3.142376  |
| 1  | 0.201693  | -3.630505 | 1.029246  | 1    | 0.554226  | 1.259586  | 4.190083  |
| 1  | -0.228409 | -3.364580 | 2.740932  | 1    | 1.838149  | 1.552742  | 2.987183  |
| 1  | -1.407262 | -2.993043 | 1.454930  | 1    | 0.365296  | 2.558696  | 2.980464  |
| 6  | 0.029414  | -0.413958 | 3.327606  | 6    | -0.038736 | -1.375977 | 2.850716  |
| 1  | -1.054054 | -0.313174 | 3.509329  | 1    | -0.515886 | -2.159177 | 2.242796  |
| 1  | 0.455726  | -1.035622 | 4.132639  | 1    | 1.008879  | -1.676690 | 3.020816  |
| 1  | 0.474399  | 0.591303  | 3.376828  | 1    | -0.544393 | -1.325615 | 3.829330  |
| 8  | -0.065937 | 2.485206  | -1.106099 | 8    | -2.881251 | -2.956070 | -0.414228 |
| 6  | -0.000001 | 3.082773  | -0.000019 | 6    | -3.407745 | -2.408626 | 0.666439  |
| 1  | -0.000002 | 4.198157  | -0.000025 | 1    | -2.661158 | -1.949636 | 1.352706  |
| 8  | 0.065936  | 2.485218  | 1.106067  | 8    | -4.593076 | -2.405605 | 0.898795  |
| 6  | -6.386760 | 0.172752  | 0.185330  | 6    | 6.483851  | -1.352469 | 0.225049  |
| 1  | -6.815839 | 1.146319  | -0.101981 | 1    | 6.801482  | -2.016235 | -0.595376 |
| 1  | -6.796237 | -0.598612 | -0.480887 | 1    | 7.105995  | -0.447627 | 0.201753  |
| 1  | -6.727111 | -0.035280 | 1.212603  | 1    | 6.682302  | -1.890525 | 1.165939  |
| 6  | 6.386759  | 0.172747  | -0.185336 | 6    | -6.038372 | 1.039422  | -0.400061 |
| 1  | 6.815843  | 1.146341  | 0.101876  | 1    | -6.394047 | 1.636960  | 0.450888  |
| 1  | 6.796241  | -0.598555 | 0.480949  | 1    | -6.384537 | 1.502190  | -1.335647 |
| 1  | 6.727101  | -0.035385 | -1.212593 | 1    | -6.508572 | 0.043532  | -0.329792 |



|    |           |           |           |      |           |           |           |
|----|-----------|-----------|-----------|------|-----------|-----------|-----------|
| 8  | -0.375244 | -2.322130 | -0.775663 | 1    | 6.898848  | 0.989431  | 0.090192  |
| 1  | -1.891140 | -2.802188 | -0.466179 | 8    | -1.613956 | 3.144555  | -1.321668 |
| 6  | -0.125706 | -2.115429 | -2.006777 | 1    | -1.252407 | 3.385743  | 0.001170  |
| 1  | -0.294323 | -2.952396 | -2.720437 | 6    | -0.862281 | 2.522732  | -2.114604 |
| 8  | 0.287078  | -1.020101 | -2.438262 | 1    | -1.020965 | 2.730585  | -3.201552 |
| B  |           |           |           | 8    | 0.042025  | 1.701757  | -1.833348 |
| 77 | 0.075130  | 0.198149  | -0.051577 | 51   |           |           |           |
| 7  | -2.014465 | -0.030834 | -0.012296 | TSAC |           |           |           |
| 6  | -2.841263 | 0.843869  | 0.610131  | 77   | 0.016697  | 0.356339  | -0.082296 |
| 6  | -2.552874 | -1.166996 | -0.537132 | 8    | -0.979123 | 4.116454  | 0.359822  |
| 6  | -4.198820 | 0.634382  | 0.743134  | 8    | 0.503915  | 3.443484  | -1.287962 |
| 1  | -2.373345 | 1.741266  | 1.005821  | 6    | -0.206280 | 3.580410  | -0.353478 |
| 6  | -3.929760 | -1.433249 | -0.430864 | 7    | 2.101849  | 0.317888  | -0.059468 |
| 6  | -4.776804 | -0.538956 | 0.213787  | 6    | 2.846875  | 1.067865  | -0.905087 |
| 1  | -4.807643 | 1.378815  | 1.258078  | 6    | 2.727438  | -0.568162 | 0.759883  |
| 1  | -4.301590 | -2.359597 | -0.869836 | 6    | 4.220512  | 0.947698  | -0.992755 |
| 7  | 2.156992  | 0.201979  | -0.055990 | 1    | 2.286622  | 1.782812  | -1.509614 |
| 6  | 2.819684  | -0.693359 | 0.726648  | 6    | 4.121258  | -0.735207 | 0.711898  |
| 6  | 2.870873  | 1.028070  | -0.858382 | 6    | 4.891401  | 0.016789  | -0.171033 |
| 6  | 4.224139  | -0.768019 | 0.699181  | 1    | 4.771070  | 1.574477  | -1.695876 |
| 6  | 4.249683  | 0.998372  | -0.920628 | 1    | 4.571349  | -1.465180 | 1.385627  |
| 1  | 2.272276  | 1.708461  | -1.464903 | 7    | -2.076535 | 0.219034  | -0.112723 |
| 6  | 4.961949  | 0.074535  | -0.125532 | 6    | -2.868589 | 1.206678  | 0.383954  |
| 1  | 4.706110  | -1.503249 | 1.344376  | 6    | -2.675754 | -0.921747 | -0.565585 |
| 1  | 4.772783  | 1.685298  | -1.587571 | 6    | -4.242643 | 1.108852  | 0.455860  |
| 8  | -1.764598 | -2.032848 | -1.146640 | 1    | -2.344250 | 2.097282  | 0.725594  |
| 8  | 2.131104  | -1.500057 | 1.511980  | 6    | -4.075837 | -1.071289 | -0.513717 |
| 14 | -0.098015 | -1.546018 | -1.510000 | 6    | -4.882645 | -0.063648 | -0.001237 |
| 14 | 0.387149  | -1.212088 | 1.726505  | 1    | -4.817764 | 1.939545  | 0.867584  |
| 6  | -0.175126 | -1.077925 | -3.333388 | 1    | -4.495789 | -2.004664 | -0.890139 |
| 1  | -0.920359 | -0.288438 | -3.505866 | 14   | -0.194856 | -1.639586 | -1.317442 |
| 1  | 0.803001  | -0.696969 | -3.667862 | 14   | 0.300124  | -0.807206 | 1.831810  |
| 1  | -0.432503 | -1.959481 | -3.944182 | 8    | 1.993064  | -1.278140 | 1.600676  |
| 6  | 0.974609  | -3.086041 | -1.398096 | 8    | -1.942901 | -1.900839 | -1.050878 |
| 1  | 1.231540  | -3.379940 | -0.372723 | 6    | -0.106234 | -1.312589 | -3.185419 |
| 1  | 0.484577  | -3.935014 | -1.902936 | 1    | -0.506034 | -2.162351 | -3.764851 |
| 1  | 1.915458  | -2.875634 | -1.933866 | 1    | -0.672394 | -0.407705 | -3.459298 |
| 6  | -0.420627 | -2.902899 | 1.902199  | 1    | 0.943319  | -1.156319 | -3.486955 |
| 1  | 0.120347  | -3.511214 | 2.646003  | 6    | 0.590338  | -3.336533 | -1.063470 |
| 1  | -1.444295 | -2.744327 | 2.281799  | 1    | 0.644070  | -3.644854 | -0.010454 |
| 1  | -0.495888 | -3.468870 | 0.965363  | 1    | 0.048827  | -4.110274 | -1.633523 |
| 6  | 0.275467  | -0.407627 | 3.428767  | 1    | 1.621949  | -3.294349 | -1.452501 |
| 1  | 0.868572  | 0.516853  | 3.464232  | 6    | -0.679088 | -2.358597 | 2.232099  |
| 1  | -0.773406 | -0.144301 | 3.644987  | 1    | -0.151905 | -2.952967 | 2.996802  |
| 1  | 0.625364  | -1.099236 | 4.213232  | 1    | -1.646520 | -2.045181 | 2.658655  |
| 8  | -1.052460 | 3.793489  | 0.977394  | 1    | -0.883828 | -2.996011 | 1.363106  |
| 6  | -0.184766 | 3.158071  | 1.692142  | 6    | 0.341315  | 0.235945  | 3.401066  |
| 1  | 0.082642  | 3.695598  | 2.625916  | 1    | -0.662348 | 0.642539  | 3.606812  |
| 8  | 0.330526  | 2.071203  | 1.445578  | 1    | 0.652127  | -0.372180 | 4.267648  |
| 6  | -6.250395 | -0.798641 | 0.344812  | 1    | 1.036349  | 1.082359  | 3.292464  |
| 1  | -6.829217 | 0.009068  | -0.131650 | 1    | -0.007088 | 1.987446  | 0.572953  |
| 1  | -6.538140 | -1.752897 | -0.116822 | 6    | 6.383793  | -0.141298 | -0.247274 |
| 1  | -6.546153 | -0.819822 | 1.406180  | 1    | 6.691748  | -0.424646 | -1.266753 |
| 6  | 6.462233  | 0.013463  | -0.176520 | 1    | 6.887235  | 0.811068  | -0.014730 |
| 1  | 6.862535  | -0.746673 | 0.507975  | 1    | 6.747867  | -0.906713 | 0.451492  |
| 1  | 6.804667  | -0.220958 | -1.197512 | 6    | -6.376601 | -0.202570 | 0.068347  |

|      |           |           |           |    |           |           |           |
|------|-----------|-----------|-----------|----|-----------|-----------|-----------|
| 1    | -6.722948 | -0.125457 | 1.111803  | 8  | -0.155496 | 0.339444  | -2.656977 |
| 1    | -6.867406 | 0.610168  | -0.491075 | 6  | -0.578896 | 1.391392  | -3.117710 |
| 1    | -6.716092 | -1.163557 | -0.341326 | 8  | -0.807335 | 2.472220  | -2.422722 |
| 56   |           |           |           | 1  | -0.806120 | 1.511408  | -4.193495 |
| TSBC |           |           |           | 1  | -0.520949 | 2.280469  | -1.467120 |
| 77   | 0.014436  | 0.113236  | -0.222998 | 56 |           |           |           |
| 8    | -0.811855 | 3.861689  | 0.694950  | C  |           |           |           |
| 8    | 1.476783  | 3.538037  | 0.587716  | 77 | 0.273565  | -0.260216 | -0.147470 |
| 6    | 0.296127  | 3.464555  | 0.542347  | 1  | 0.014882  | -1.892084 | 0.510735  |
| 7    | 2.097101  | 0.027776  | -0.218009 | 7  | 2.357697  | -0.423748 | 0.051507  |
| 6    | 2.840209  | 0.288515  | -1.319366 | 6  | 2.966281  | -1.579868 | 0.421508  |
| 6    | 2.726413  | -0.387538 | 0.915107  | 6  | 3.136583  | 0.680084  | -0.143736 |
| 6    | 4.213073  | 0.144704  | -1.347436 | 6  | 4.326735  | -1.691840 | 0.620725  |
| 1    | 2.278391  | 0.609008  | -2.196920 | 1  | 2.301373  | -2.430876 | 0.557138  |
| 6    | 4.122142  | -0.555112 | 0.942239  | 6  | 4.531113  | 0.622310  | 0.054162  |
| 6    | 4.889096  | -0.293661 | -0.188567 | 6  | 5.149913  | -0.559110 | 0.441033  |
| 1    | 4.758069  | 0.366898  | -2.266009 | 1  | 4.747896  | -2.652861 | 0.919599  |
| 1    | 4.575078  | -0.892450 | 1.875091  | 1  | 5.100120  | 1.537565  | -0.112666 |
| 7    | -2.075858 | 0.016034  | -0.103657 | 7  | -1.770244 | 0.136665  | -0.333003 |
| 6    | -2.845789 | 1.126816  | 0.034359  | 6  | -2.371672 | 0.915956  | 0.606674  |
| 6    | -2.685713 | -1.203085 | -0.073398 | 6  | -2.500752 | -0.286934 | -1.389716 |
| 6    | -4.216625 | 1.079322  | 0.180577  | 6  | -3.723235 | 1.284739  | 0.479357  |
| 1    | -2.309455 | 2.075205  | 0.046417  | 6  | -3.832654 | 0.037154  | -1.561538 |
| 6    | -4.083043 | -1.307006 | 0.069789  | 1  | -1.963680 | -0.896950 | -2.115947 |
| 6    | -4.872219 | -0.170971 | 0.197515  | 6  | -4.478178 | 0.850916  | -0.605820 |
| 1    | -4.776185 | 2.009589  | 0.288558  | 1  | -4.153751 | 1.911408  | 1.261151  |
| 1    | -4.514970 | -2.308223 | 0.080982  | 1  | -4.368365 | -0.336922 | -2.435007 |
| 14   | -0.221475 | -2.200729 | -0.530365 | 8  | 2.588054  | 1.815143  | -0.517527 |
| 14   | 0.310778  | -0.106946 | 2.026859  | 8  | -1.669488 | 1.325122  | 1.644915  |
| 8    | 2.006098  | -0.640764 | 1.992909  | 14 | 0.875759  | 1.830846  | -1.045311 |
| 8    | -1.963753 | -2.300577 | -0.165423 | 14 | -0.076342 | 0.583556  | 1.938546  |
| 6    | -0.128455 | -2.817837 | -2.313516 | 6  | 1.036026  | 1.943546  | -2.929426 |
| 1    | -0.478464 | -3.861279 | -2.386754 | 1  | 0.031732  | 1.992709  | -3.383831 |
| 1    | -0.728786 | -2.185480 | -2.982757 | 1  | 1.595157  | 2.843471  | -3.237169 |
| 1    | 0.916282  | -2.780856 | -2.665028 | 1  | 1.538780  | 1.051326  | -3.331796 |
| 6    | 0.608990  | -3.542898 | 0.502140  | 6  | 0.214358  | 3.516224  | -0.505291 |
| 1    | 0.691964  | -3.302170 | 1.569617  | 1  | 0.901207  | 4.327955  | -0.798930 |
| 1    | 0.079123  | -4.504033 | 0.392384  | 1  | -0.743381 | 3.684552  | -1.027166 |
| 1    | 1.630967  | -3.678509 | 0.108748  | 1  | 0.020621  | 3.586941  | 0.573488  |
| 6    | -0.666878 | -1.355625 | 3.040158  | 6  | 1.022554  | 1.921625  | 2.678260  |
| 1    | -0.094183 | -1.659320 | 3.932290  | 1  | 0.482901  | 2.480106  | 3.461217  |
| 1    | -1.584414 | -0.852611 | 3.389233  | 1  | 1.883577  | 1.424319  | 3.156148  |
| 1    | -0.965448 | -2.253971 | 2.485798  | 1  | 1.413311  | 2.630388  | 1.937248  |
| 6    | 0.384651  | 1.455890  | 3.080838  | 6  | -0.438971 | -0.630627 | 3.336744  |
| 1    | -0.571314 | 2.000361  | 3.020767  | 1  | 0.459307  | -1.232931 | 3.551503  |
| 1    | 0.571668  | 1.201135  | 4.137424  | 1  | -0.729328 | -0.102993 | 4.261251  |
| 1    | 1.183698  | 2.125542  | 2.732652  | 1  | -1.249361 | -1.316475 | 3.047738  |
| 1    | 0.012289  | 1.918965  | -0.149201 | 8  | 0.488292  | -1.280340 | -2.337647 |
| 6    | 6.382067  | -0.461811 | -0.186385 | 6  | 0.506515  | -2.510375 | -2.371338 |
| 1    | 6.694366  | -1.164736 | -0.975363 | 1  | 0.683446  | -3.050389 | -3.322301 |
| 1    | 6.879365  | 0.498502  | -0.399184 | 8  | 0.325620  | -3.292739 | -1.354747 |
| 1    | 6.747863  | -0.835822 | 0.779498  | 1  | 0.161770  | -2.677263 | -0.499685 |
| 6    | -6.363548 | -0.256186 | 0.354694  | 6  | 6.633678  | -0.641717 | 0.660610  |
| 1    | -6.679741 | 0.213376  | 1.300238  | 1  | 7.079124  | -1.414326 | 0.013405  |
| 1    | -6.869597 | 0.290221  | -0.457566 | 1  | 7.129738  | 0.316263  | 0.453630  |
| 1    | -6.715110 | -1.296782 | 0.347336  | 1  | 6.854211  | -0.931216 | 1.700995  |

|      |           |           |           |                 |           |           |           |
|------|-----------|-----------|-----------|-----------------|-----------|-----------|-----------|
| 6    | -5.933423 | 1.195029  | -0.743211 | 6               | 1.023237  | 1.954220  | 2.674999  |
| 1    | -6.547993 | 0.302816  | -0.538879 | 1               | 0.481277  | 2.500365  | 3.464954  |
| 1    | -6.232281 | 1.984265  | -0.039802 | 1               | 1.893460  | 1.464655  | 3.144152  |
| 1    | -6.167008 | 1.524036  | -1.767391 | 1               | 1.400974  | 2.673128  | 1.936967  |
| 6    | -4.451248 | -1.967897 | 1.100399  | 6               | -0.414176 | -0.617008 | 3.325971  |
| 8    | -3.334943 | -2.044504 | 1.417276  | 1               | 0.488233  | -1.214530 | 3.536672  |
| 8    | -5.569318 | -1.899374 | 0.788894  | 1               | -0.707656 | -0.096743 | 4.253549  |
| 56   |           |           |           | 1               | -1.220162 | -1.306857 | 3.033625  |
| TSCA |           |           |           | 8               | 0.449076  | -1.303098 | -2.287491 |
| 77   | 0.280144  | -0.255178 | -0.153194 | 6               | 0.434120  | -2.544648 | -2.275206 |
| 1    | 0.003716  | -1.910794 | 0.555007  | 1               | 0.579549  | -3.097112 | -3.227482 |
| 7    | 2.361883  | -0.426903 | 0.036122  | 8               | 0.257560  | -3.282206 | -1.244900 |
| 6    | 2.970311  | -1.590109 | 0.381067  | 1               | 0.108942  | -2.557035 | -0.313850 |
| 6    | 3.138296  | 0.679815  | -0.145333 | 6               | 6.637050  | -0.651447 | 0.627856  |
| 6    | 4.331629  | -1.703412 | 0.574404  | 1               | 7.081461  | -1.410717 | -0.035627 |
| 1    | 2.307713  | -2.445959 | 0.497933  | 1               | 7.131433  | 0.310961  | 0.438316  |
| 6    | 4.532392  | 0.621757  | 0.048382  | 1               | 6.860550  | -0.961086 | 1.661753  |
| 6    | 5.152679  | -0.566335 | 0.413785  | 6               | -5.928594 | 1.194680  | -0.736388 |
| 1    | 4.755360  | -2.669315 | 0.853120  | 1               | -6.540150 | 0.300657  | -0.531041 |
| 1    | 5.100646  | 1.539724  | -0.105389 | 1               | -6.228353 | 1.983097  | -0.032499 |
| 7    | -1.763494 | 0.146270  | -0.333379 | 1               | -6.164510 | 1.522746  | -1.760297 |
| 6    | -2.364211 | 0.924782  | 0.607536  | 6               | -4.439960 | -1.973971 | 1.086510  |
| 6    | -2.493504 | -0.277344 | -1.390810 | 8               | -3.322197 | -2.049901 | 1.398374  |
| 6    | -3.717240 | 1.289546  | 0.482739  | 8               | -5.559361 | -1.905700 | 0.779831  |
| 6    | -3.826405 | 0.043214  | -1.559526 | 5               |           |           |           |
| 1    | -1.953228 | -0.882435 | -2.118750 | HCOOH           |           |           |           |
| 6    | -4.472422 | 0.854092  | -0.601406 | 6               | -0.070484 | 0.432479  | 0.020809  |
| 1    | -4.148117 | 1.914988  | 1.265261  | 8               | -1.114535 | -0.269021 | -0.016950 |
| 1    | -4.362620 | -0.330321 | -2.432878 | 8               | 1.059472  | -0.116657 | -0.051433 |
| 8    | 2.582101  | 1.817742  | -0.504061 | 1               | -0.143528 | 1.495878  | 0.114341  |
| 8    | -1.661539 | 1.337264  | 1.643588  | 1               | 1.006941  | -1.005329 | 0.307875  |
| 14   | 0.879719  | 1.817996  | -1.048673 | 3               |           |           |           |
| 14   | -0.062232 | 0.607018  | 1.933571  | CO <sub>2</sub> |           |           |           |
| 6    | 1.043433  | 1.903100  | -2.930654 | 6               | 0.000000  | 0.000000  | 0.000000  |
| 1    | 0.040076  | 1.926721  | -3.388577 | 8               | 0.000000  | 0.000000  | 1.163049  |
| 1    | 1.587358  | 2.808450  | -3.248916 | 8               | 0.000000  | 0.000000  | -1.163049 |
| 1    | 1.564063  | 1.013942  | -3.316248 | 2               |           |           |           |
| 6    | 0.179520  | 3.487402  | -0.519999 | H <sub>2</sub>  |           |           |           |
| 1    | 0.856353  | 4.309341  | -0.807705 | 1               | 0.000000  | 0.000000  | 0.380606  |
| 1    | -0.773478 | 3.636548  | -1.055841 | 1               | 0.000000  | 0.000000  | -0.380606 |
| 1    | -0.029567 | 3.557735  | 0.555633  |                 |           |           |           |
